# Supplementary material for: Taxonomic Characterization of Honey Bee (Apis mellifera) Pollen Foraging Based on Non-Overlapping Paired-End Sequencing of Nuclear Ribosomal Loci
Source: PubMed Central journal article supplement (PMC4689544; doi:10.1371/journal.pone.0145365), 2015-12-23
Supplement: pone.0145365.s001.pdf [file pone.0145365.s001.pdf]

Supporting Information File 1. Apiary locations, sample dates, and replicate number.

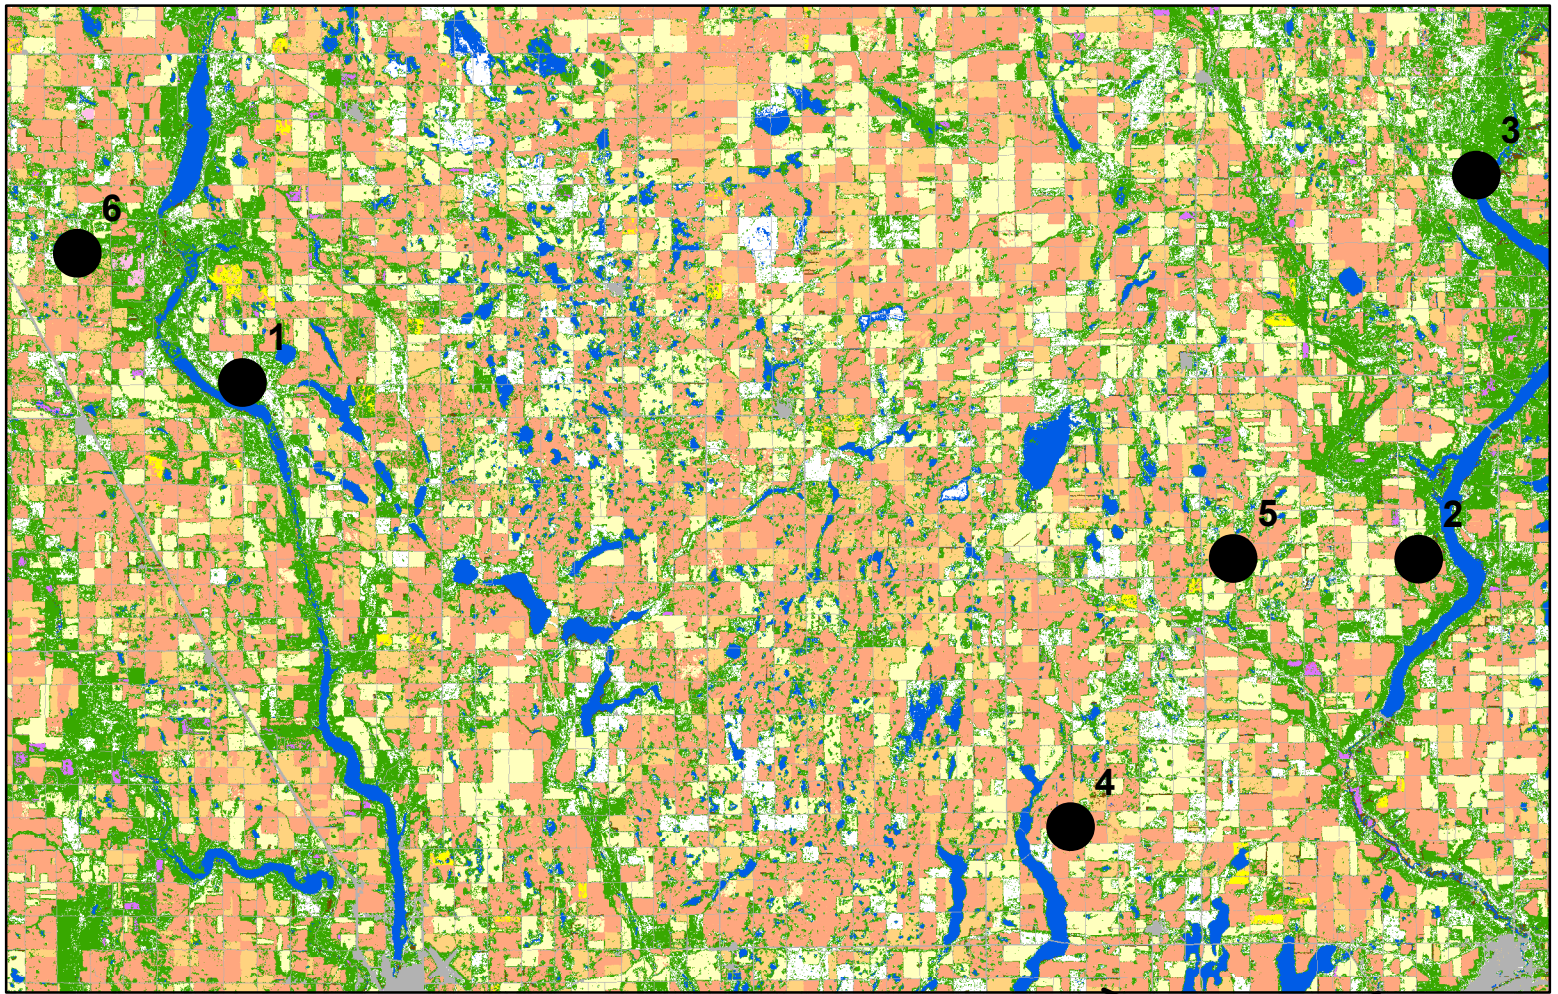

**Legend**

- Apiary
- 2010 National Agricultural Statistic Service Land Cover Type**
- Alfalfa
  - Grassland
  - Canola
  - Other Cultivated
  - Corn
  - Small Grains
  - Developed
  - Soybeans
  - Forest
  - Sunflower
  - Water

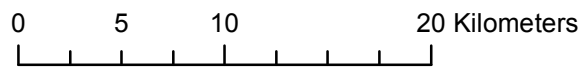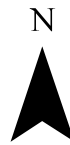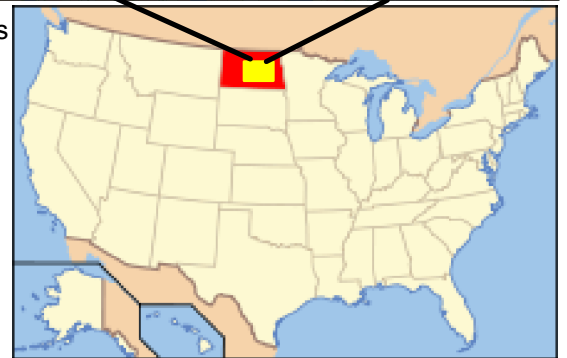

| Julian Day | Calendar Day | Apiary 1 | Apiary 2 | Apiary 3 | Apiary 4 | Apiary 5 | Apiary 6 |
|------------|--------------|----------|----------|----------|----------|----------|----------|
| 184        | Jul 3, 2009  | 2        | 2        | 2        | 2        | 1        | 2        |
| 189        | Jul 8, 2009  | 2        | 2        | 2        | 2        | 2        | 2        |
| 199        | Jul 18, 2009 | 2        | 1        | 2        | 1        | 2        | 2        |
| 215        | Aug 3, 2009  | 2        | 1        | 2        | 2        | 2        | 2        |
| 226        | Aug 14, 2009 | 2        | 2        | 2        | 2        | 1        | 2        |
| 239        | Aug 27, 2009 | 2        | 1        | 2        | 2        | 2        | 3        |
| 172        | Jun 21, 2010 | 3        | 0        | 3        | 0        | 0        | 0        |
| 200        | Jul 19, 2010 | 4        | 0        | 3        | 0        | 0        | 0        |
| 213        | Aug 1, 2010  | 4        | 0        | 3        | 0        | 0        | 0        |
| 229        | Aug 17, 2010 | 4        | 0        | 1        | 0        | 0        | 0        |
| 237        | Aug 25, 2010 | 2        | 0        | 0        | 0        | 0        | 0        |
| 251        | Sep 8, 2010  | 2        | 0        | 0        | 0        | 0        | 0        |
