# Supplementary material for: Taxonomic Characterization of Honey Bee (Apis mellifera) Pollen Foraging Based on Non-Overlapping Paired-End Sequencing of Nuclear Ribosomal Loci
Source: PubMed Central journal article supplement (PMC4689544; doi:10.1371/journal.pone.0145365), 2015-12-23

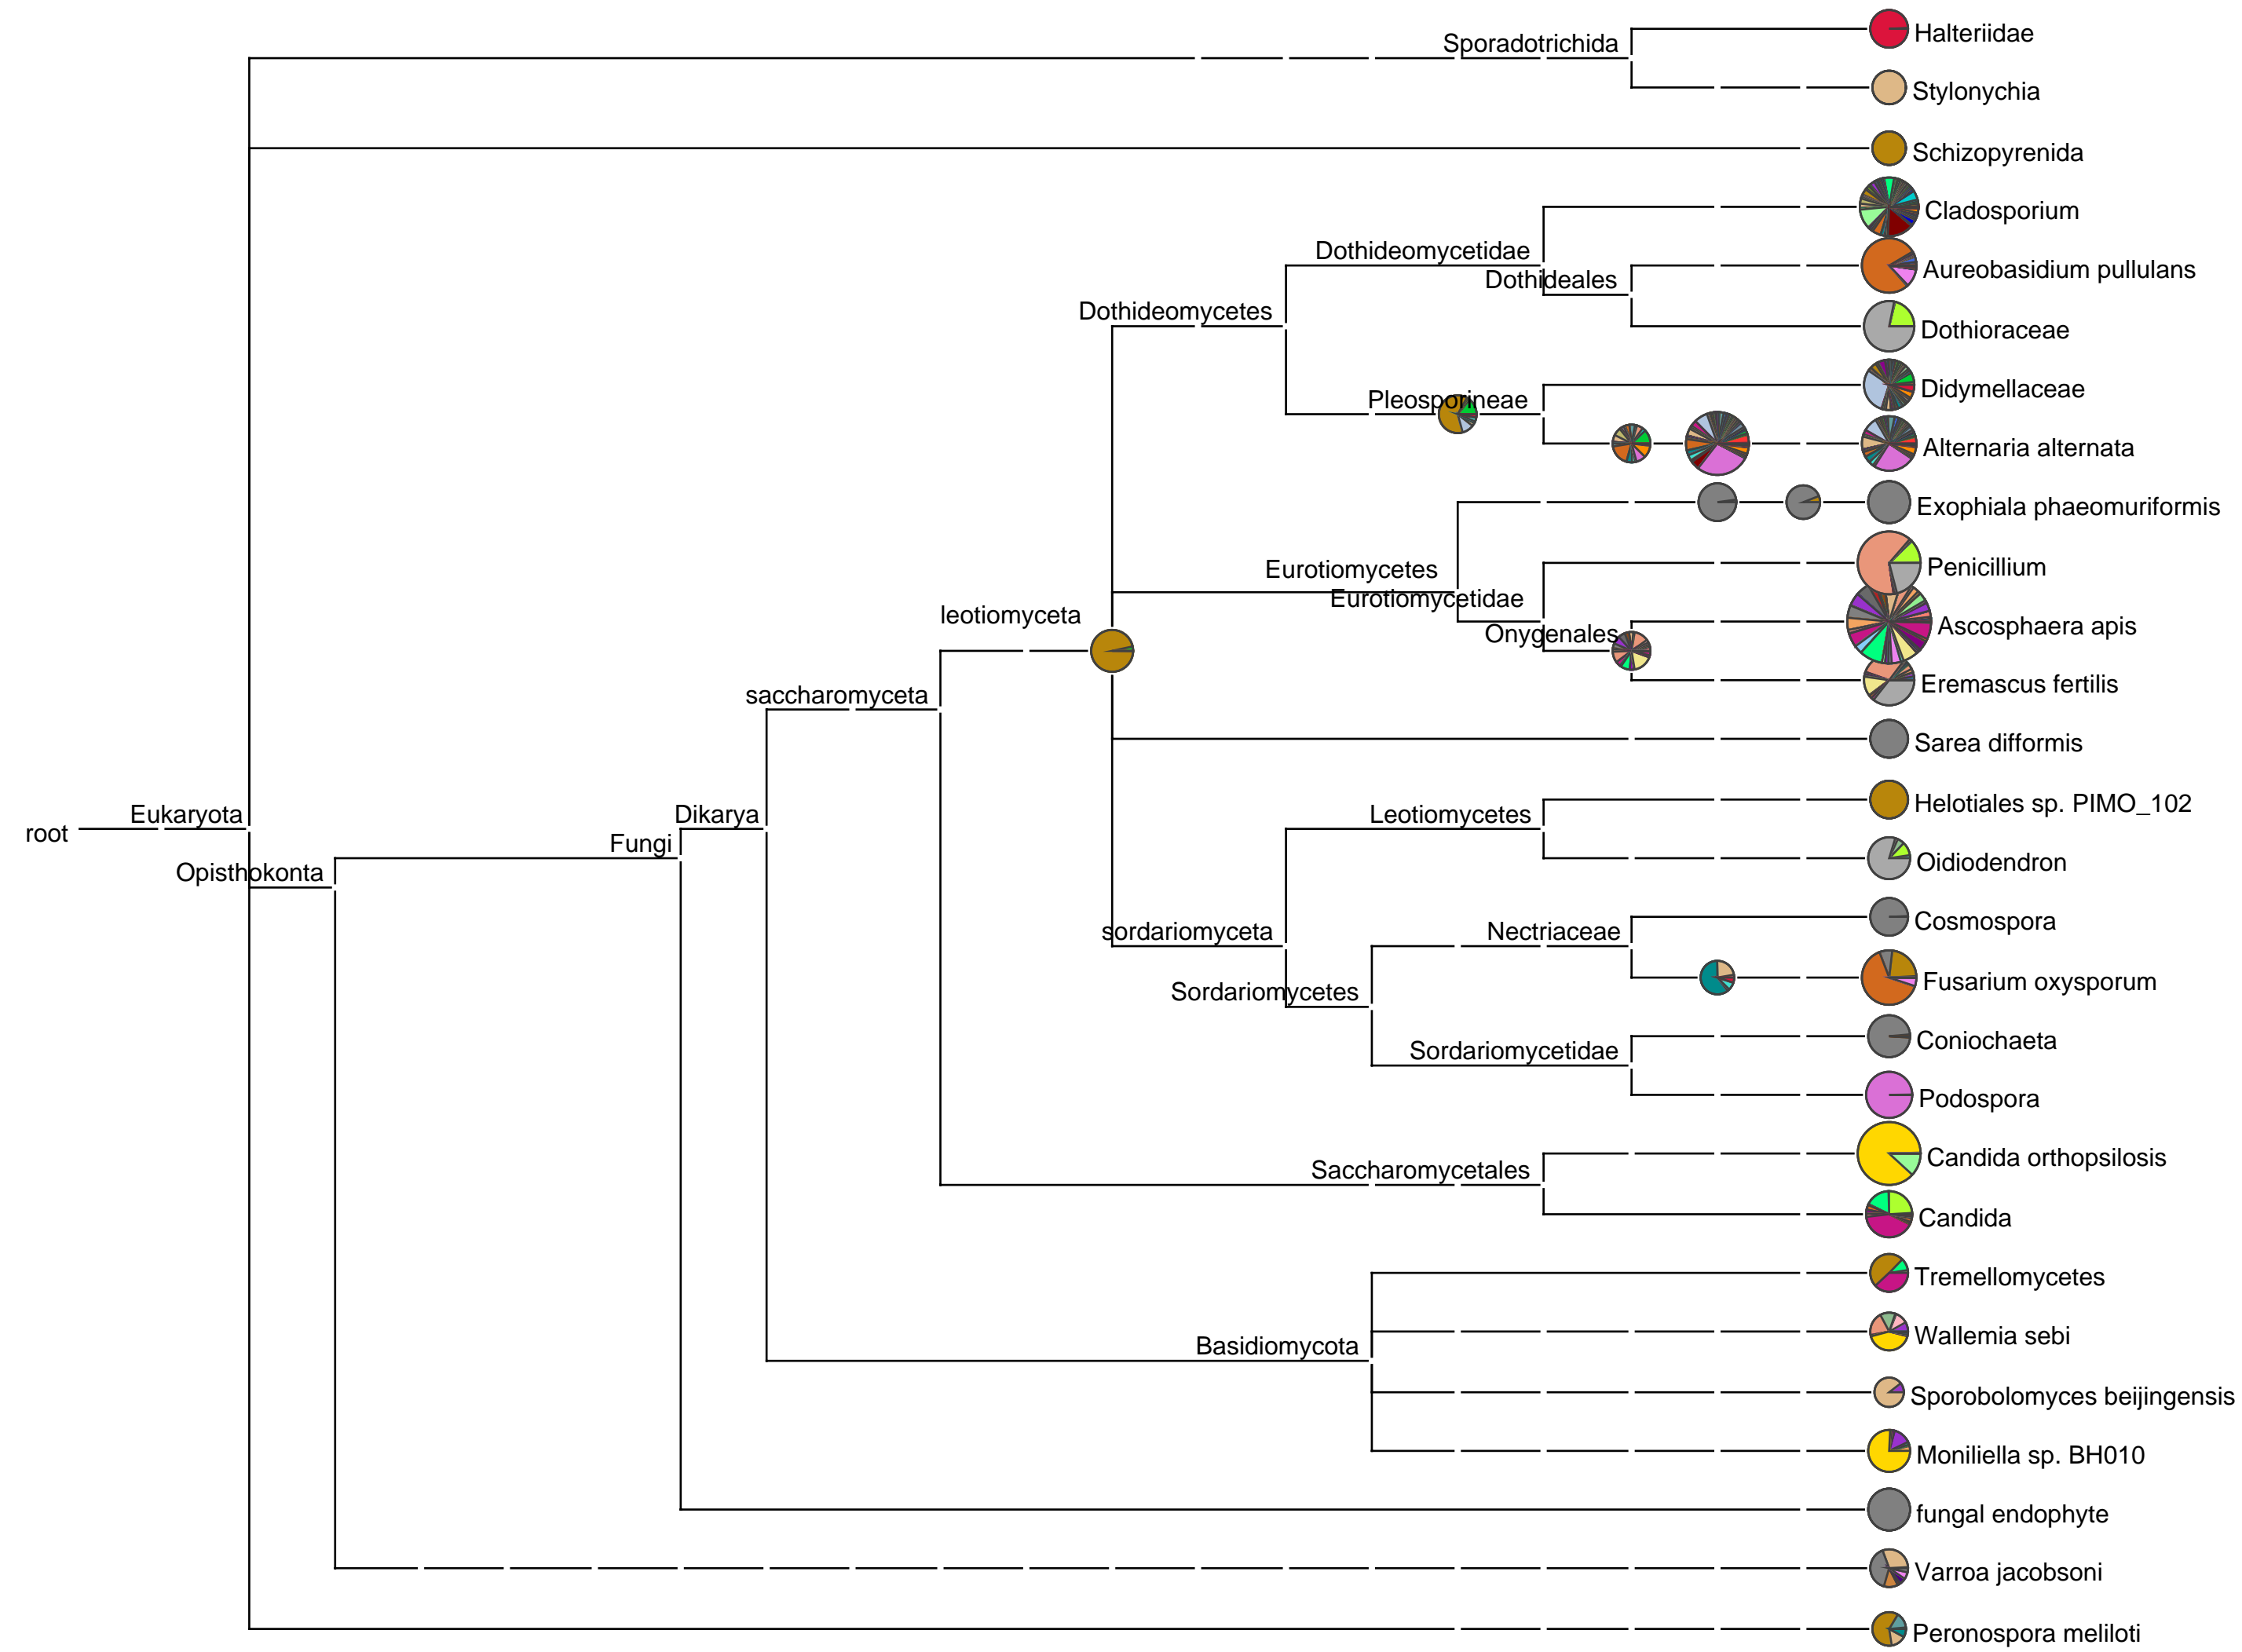

Supplement: pone.0145365.s009.pdf [file pone.0145365.s009.pdf]
